# Supplementary material for: Highly phosphorescent green emitting iridium(iii) complexes for application in OLEDs
Source: Royal Society of Chemistry journal article supplement (doi:10.1039/c4nj01334d), 2014-10-27
Supplement: c4nj01334d1.pdf [file c4nj01334d1.pdf]

## **Highly phosphorescent green emitting iridium(III) complex for application in OLEDs**

**J. Jayabharathi\*, V. Thanikachalam, R. Sathishkumar**

*Department of Chemistry, Annamalai University, Annamalainagar 608 002, Tamilnadu, India.*

\*Address for correspondence

Dr. J. Jayabharathi

Professor of Chemistry

Department of Chemistry

Annamalai University

Annamalainagar 608 002

Tamilnadu, India.

Tel: +91 9443940735

E-mail: jtchalam2005@yahoo.co.in

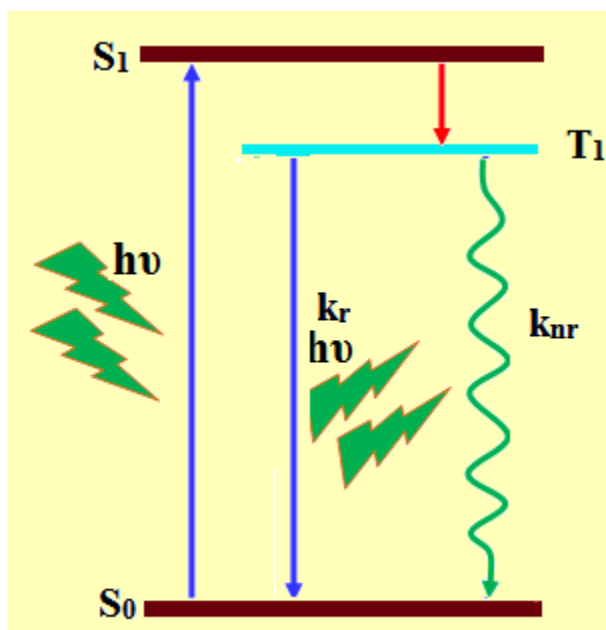

**Figure S1.** Schematic representation of emission kinetics

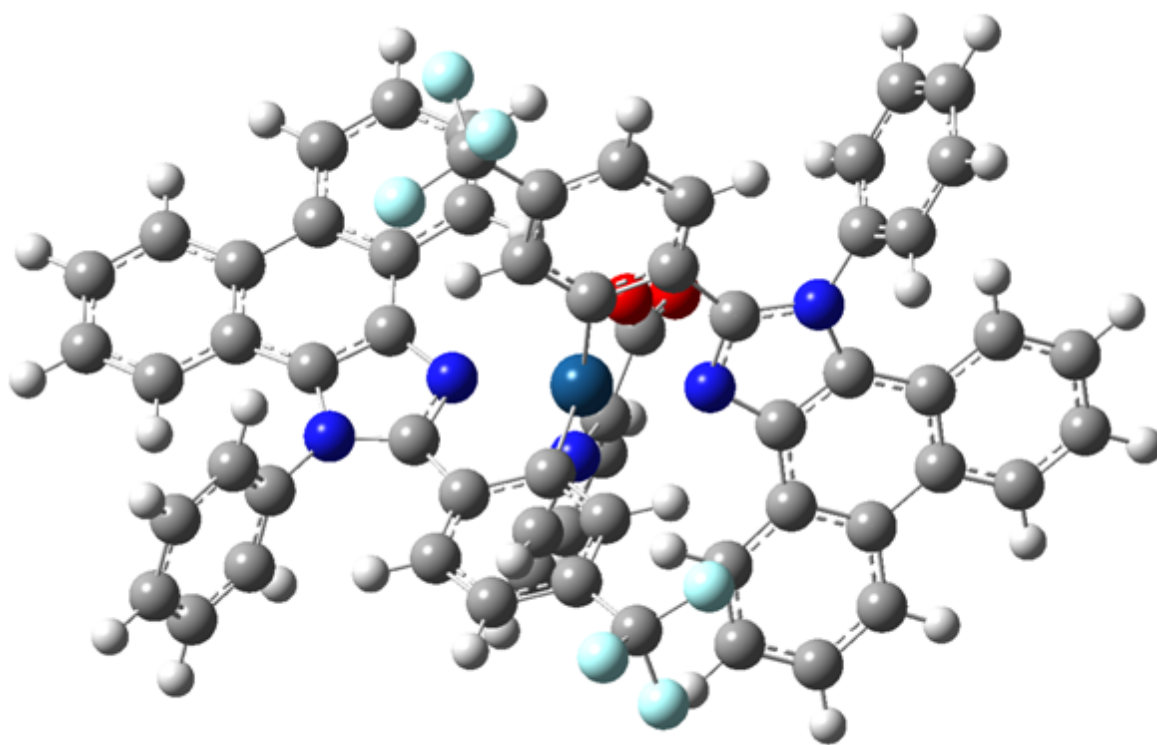

**Figure S2.** Optimized structure of Ir(tmpp)<sub>2</sub> (pic)

**Table S1.** XYZ coordinates of complex Ir(tmpp)<sub>2</sub>(pic).

|    |           |           |           |
|----|-----------|-----------|-----------|
| 77 | 0.075453  | -0.063582 | -0.250610 |
| 6  | -0.437265 | -1.487110 | 1.069281  |
| 6  | -1.382008 | -3.563204 | 2.799950  |
| 6  | 0.453244  | -2.209296 | 1.898149  |
| 6  | -1.829089 | -1.821739 | 1.154437  |
| 6  | -2.290305 | -2.853255 | 2.008613  |
| 6  | -0.011961 | -3.228702 | 2.745658  |
| 1  | 1.509523  | -1.961936 | 1.890597  |
| 6  | 0.227452  | 1.346285  | 1.188785  |
| 6  | 0.741049  | 3.481593  | 3.016393  |
| 6  | 1.553425  | 1.829615  | 1.424170  |
| 6  | -0.824117 | 1.956659  | 1.903233  |
| 6  | -0.569638 | 3.003793  | 2.806286  |
| 6  | 1.803947  | 2.891422  | 2.324124  |
| 1  | 2.808683  | 3.254897  | 2.501781  |
| 7  | -0.039747 | -1.217881 | -2.094615 |
| 6  | -0.205660 | -2.413219 | -4.628902 |
| 6  | -0.636190 | -2.429054 | -2.245655 |
| 6  | 0.455089  | -0.576811 | -3.194483 |
| 6  | 0.399613  | -1.156065 | -4.471344 |
| 6  | -0.742284 | -3.054416 | -3.494978 |
| 1  | 0.824141  | -0.596417 | -5.297812 |
| 1  | -1.226222 | -4.023198 | -3.570153 |
| 1  | -0.264748 | -2.880427 | -5.607984 |
| 1  | -3.340960 | -3.104532 | 2.072843  |
| 1  | -1.844110 | 1.617557  | 1.760801  |
| 6  | -2.642415 | -0.945426 | 0.320670  |
| 6  | -3.031698 | 0.811437  | -1.002622 |
| 7  | -4.008618 | -0.890616 | 0.114365  |
| 7  | -2.023606 | 0.054215  | -0.370408 |

|   |           |           |           |
|---|-----------|-----------|-----------|
| 6 | -4.273551 | 0.209181  | -0.731379 |
| 6 | 2.550975  | 1.047908  | 0.702286  |
| 6 | 4.395775  | 0.133440  | -0.222445 |
| 7 | 2.149392  | -0.097749 | 0.089007  |
| 6 | 3.294250  | -0.707065 | -0.444567 |
| 7 | 3.907765  | 1.231178  | 0.521595  |
| 6 | 1.017284  | 0.823556  | -2.990673 |
| 8 | 1.582437  | 1.407766  | -3.950747 |
| 8 | 0.813736  | 1.316745  | -1.779618 |
| 6 | 4.636122  | 2.408167  | 0.938373  |
| 6 | 6.020258  | 4.709635  | 1.740167  |
| 6 | 5.389519  | 2.383579  | 2.125564  |
| 6 | 4.564574  | 3.568629  | 0.146830  |
| 6 | 5.260248  | 4.722146  | 0.553456  |
| 6 | 6.084549  | 3.539959  | 2.524640  |
| 1 | 5.428819  | 1.475675  | 2.721018  |
| 1 | 3.972686  | 3.561098  | -0.764345 |
| 6 | -4.974731 | -1.763454 | 0.741845  |
| 6 | -6.838909 | -3.457755 | 1.975953  |
| 6 | -5.302816 | -2.990523 | 0.138244  |
| 6 | -5.569120 | -1.373485 | 1.955652  |
| 6 | -6.504454 | -2.225015 | 2.571763  |
| 6 | -6.237630 | -3.839004 | 0.759394  |
| 1 | -4.835965 | -3.269143 | -0.802301 |
| 1 | -5.301889 | -0.421001 | 2.404424  |
| 1 | -1.014859 | -2.896495 | -1.343629 |
| 1 | 6.555642  | 5.602688  | 2.052127  |
| 1 | -7.560502 | -4.114514 | 2.454756  |
| 1 | 6.668534  | 3.528255  | 3.441027  |
| 1 | -6.494777 | -4.788598 | 0.297847  |
| 1 | -6.965916 | -1.928642 | 3.509706  |
| 1 | 5.207209  | 5.622853  | -0.051975 |

|   |           |           |           |
|---|-----------|-----------|-----------|
| 6 | -5.524173 | 0.681211  | -1.281062 |
| 6 | -5.460603 | 1.861704  | -2.097437 |
| 6 | -2.958865 | 2.042384  | -1.764307 |
| 6 | -4.183453 | 2.560066  | -2.309242 |
| 6 | -4.122756 | 3.777860  | -3.042563 |
| 1 | -5.025759 | 4.204614  | -3.463613 |
| 6 | -2.922035 | 4.462483  | -3.228722 |
| 1 | -2.908777 | 5.390623  | -3.794618 |
| 6 | -1.727369 | 3.951595  | -2.671250 |
| 1 | -0.785947 | 4.475950  | -2.807500 |
| 1 | -0.826109 | 2.384949  | -1.533458 |
| 6 | -1.750894 | 2.762823  | -1.944185 |
| 1 | -6.657421 | 3.214281  | -3.309799 |
| 6 | -6.670473 | 2.332640  | -2.680064 |
| 1 | -8.794067 | 2.077070  | -2.935650 |
| 6 | -7.889872 | 1.689251  | -2.473781 |
| 1 | -8.890940 | 0.022119  | -1.499240 |
| 6 | -7.944668 | 0.530466  | -1.664705 |
| 1 | -6.844947 | -0.854714 | -0.474244 |
| 6 | -6.779614 | 0.036625  | -1.081450 |
| 1 | 0.925561  | 4.288201  | 3.719309  |
| 1 | -1.729283 | -4.348460 | 3.463796  |
| 6 | 5.713706  | -0.148592 | -0.742461 |
| 6 | 5.873315  | -1.389014 | -1.453394 |
| 6 | 4.757902  | -2.342830 | -1.559967 |
| 6 | 3.461316  | -2.008962 | -1.046300 |
| 1 | 1.477777  | -2.733574 | -0.601484 |
| 6 | 2.425578  | -2.978055 | -1.059498 |
| 1 | 1.831643  | -4.975186 | -1.605127 |
| 6 | 2.630749  | -4.238486 | -1.614863 |
| 1 | 4.058901  | -5.546934 | -2.603151 |
| 6 | 3.891229  | -4.564197 | -2.169913 |

|   |           |           |           |
|---|-----------|-----------|-----------|
| 1 | 5.894864  | -3.927227 | -2.531306 |
| 6 | 4.930389  | -3.634323 | -2.132252 |
| 1 | 7.294606  | -2.587030 | -2.582904 |
| 6 | 7.144891  | -1.669751 | -2.025099 |
| 1 | 9.176993  | -1.034195 | -2.354587 |
| 6 | 8.219671  | -0.790079 | -1.901647 |
| 1 | 8.890157  | 1.113999  | -1.092832 |
| 6 | 8.057814  | 0.422094  | -1.190700 |
| 1 | 6.716992  | 1.674105  | -0.098454 |
| 6 | 6.824072  | 0.735719  | -0.623905 |
| 6 | -1.700713 | 3.659873  | 3.535096  |
| 6 | 0.960308  | -4.015645 | 3.569033  |
| 9 | -1.387478 | 3.964360  | 4.875587  |
| 9 | -2.868095 | 2.879547  | 3.574001  |
| 9 | -2.091239 | 4.894649  | 2.962269  |
| 9 | 0.419723  | -4.449695 | 4.793646  |
| 9 | 2.130455  | -3.308401 | 3.880406  |
| 9 | 1.396748  | -5.198971 | 2.918871  |
